# Supplementary material
Source: Springer Nature journal article supplement (https://www.springermedizin.de/resource/supplementary/12879_2013_2443_MOESM5_ESM.pdf/9444590)
Supplement: MOESM5 [file 9444590]

Table 5: Multivariate associations of the levels of adherence to ART among study participants in Tigray regional state, northern Ethiopia, 2012

| Characteristics of study participants                                         | Status of adherence to ART<br>Non-adherent to ART<br>Number (%) | Adherent to ART<br>Number (%) | COR (95%CI)     | AOR (95%CI)       |
|-------------------------------------------------------------------------------|-----------------------------------------------------------------|-------------------------------|-----------------|-------------------|
| <b>Mean BMI of latest four visits (Kg/m<sup>2</sup>)</b>                      |                                                                 |                               |                 |                   |
| <18.5                                                                         | 74(42.5)                                                        | 14(8)                         | 7.7(3.8 – 15.4) | 10.0(4.3 – 54.7)  |
| ≥18.5                                                                         | 100(57.5)                                                       | 160(92)                       | r               | r                 |
| <b>Unable to get enough and/or quality food</b>                               |                                                                 |                               |                 |                   |
| Yes                                                                           | 119(68.4)                                                       | 80(46)                        | 2.6(1.6 – 4.2)  | 2.1(1.1 – 11.5)   |
| No                                                                            | 55(31.6)                                                        | 94(54)                        | r               | r                 |
| <b>Consumption pattern of last 24 hours</b>                                   |                                                                 |                               |                 |                   |
| Three meals & above                                                           | 124(71.3)                                                       | 163(93.7)                     | r               | r                 |
| Less than three meals                                                         | 50(28.7)                                                        | 11(6.3)                       | 8.8(3.5 – 22.2) | 10.9(1.3 – 81.4)  |
| <b>Mean CD<sub>4</sub> count of latest four visits (cells/mm<sup>3</sup>)</b> |                                                                 |                               |                 |                   |
| <350                                                                          | 118(67.8)                                                       | 25(15.5)                      | 8.6(4.7 – 15.6) | 18.3(6.7 – 102.7) |
| ≥350                                                                          | 56(32.2)                                                        | 147(84.5)                     | r               | r                 |
| <b>Appétit in last 7 days</b>                                                 |                                                                 |                               |                 |                   |
| Good                                                                          | 89(51.1)                                                        | 135(77.6)                     | r               | r                 |
| Poor                                                                          | 85(48.9)                                                        | 39(22.4)                      | 3.6(2.1 – 6.0)  | 2.0(0.7 – 6.0)    |
| <b>I could not afford to eat balanced meals</b>                               |                                                                 |                               |                 |                   |
| Yes                                                                           | 160(92)                                                         | 136(78.1)                     | 2.7(1.5 – 5.0)  | 2.0(0.5 – 11.9)   |
| No                                                                            | 14(8)                                                           | 38(21.9)                      | r               | r                 |
| <b>Education</b>                                                              |                                                                 |                               |                 |                   |

|                                             |           |           |                 |                 |
|---------------------------------------------|-----------|-----------|-----------------|-----------------|
| <b>No education</b>                         | 31(17.8)  | 37(21.3)  | 4.5(2.0 – 10.3) | 5.6(0.7 – 42.9) |
| <b>Elementary (1 - 8)</b>                   | 94(54)    | 58(33.3)  | 2.3(1.0 – 5.6)  | 1.9(0.2 – 14.9) |
| <b>Secondary (9 - 12)</b>                   | 38(21.8)  | 49(28.2)  | 2.6(1.1 – 6.2)  | 0.6(0.1 – 4.2)  |
| <b>12+</b>                                  | 11(6.4)   | 30(17.2)  | r               | r               |
| <b>Average Monthly income (Ethio. Birr)</b> |           |           |                 |                 |
| • <b>no income</b>                          | 25(14.4)  | 26(14.9)  | 2.6(1.4 – 4.6)  | 1.4(0.4 – 5.9)  |
| • <b>≤ 500</b>                              | 94(54)    | 65(37.4)  | 1.3(0.6 – 2.6)  | 1.0(0.2 – 6.6)  |
| • <b>501-999</b>                            | 24(13.8)  | 31(17.8)  | 1.7(0.8 – 3.6)  | 3.0(0.6 – 19.1) |
| • <b>≥ 1000</b>                             | 31(17.8)  | 52(29.9)  | r               | r               |
| <b>Distance to hospital (Km)</b>            |           |           |                 |                 |
| <b>≤10</b>                                  | 112(64.4) | 130(74.7) | r               | r               |
| <b>&gt;10</b>                               | 62(35.6)  | 44(25.3)  | 1.6(1.0 – 2.6)  | 1.9(0.8 – 10.3) |

N.B:- BMI=Body Mass Index, CD<sub>4</sub>=Cluster of Differentiation 4

r:- reference
